# Supplementary material for: Roots and Panicles of the C4 Model Grasses Setaria viridis (L). and S. pumila Host Distinct Bacterial Assemblages With Core Taxa Conserved Across Host Genotypes and Sampling Sites
Source: Front Microbiol. 2018 Nov 12;9:2708. doi: 10.3389/fmicb.2018.02708 (PMC6240606; doi:10.3389/fmicb.2018.02708)
Supplement: Supplementary file 3 [file Data_Sheet_3.xls]

## Sheet: Differential_abundance_panicles
Supplementary Data S2: Differentially abundant OTUs in panicles (as compared to root tissues). Positive log2FoldChange values indicate enriched OTUs, while negative values illustrate depleted OTUs in panicles.
#OTU	baseMean	log2FoldChange	lfcSE	padj	Phylum	Class	Family	Genus
OTU_20879	79.2854	6.81141	0.60783	9.1139e-27	Proteobacteria	Gammaproteobacteria	Halomonadaceae	Halomonas
OTU_20877	61.344	6.52691	0.562645	1.96439e-28	Proteobacteria	Gammaproteobacteria	Moraxellaceae	Psychrobacter
OTU_22265	7.1368	5.58392	1.14992	3.58769e-05	Actinobacteria	Actinobacteria	Corynebacteriaceae	Corynebacterium 1
OTU_563	22.5619	5.26901	1.09978	4.41729e-05	Actinobacteria	Actinobacteria	Dermabacteraceae	Brachybacterium
OTU_19521	4.02318	4.89355	1.23015	0.000924705	Actinobacteria	Actinobacteria	Microbacteriaceae	Leucobacter
OTU_22258	9.53702	4.79435	1.2677	0.00146161	Bacteroidetes	Flavobacteriia	Flavobacteriaceae	Psychroflexus
OTU_688	3.49412	4.44789	1.30168	0.00439464	Proteobacteria	belongs_to_p_Proteobacteria	belongs_to_p_Proteobacteria	belongs_to_p_Proteobacteria
OTU_25345	3.86053	4.41871	1.25158	0.00315337	Bacteroidetes	Flavobacteriia	Flavobacteriaceae	Mesonia
OTU_235	6.76624	4.37443	1.14632	0.00129906	Proteobacteria	Gammaproteobacteria	Moraxellaceae	Enhydrobacter
OTU_23641	4.23358	4.27014	1.27034	0.00515882	Bacteroidetes	Flavobacteriia	Flavobacteriaceae	Mesonia
OTU_23606	2.34667	4.07088	0.779278	5.99365e-06	Proteobacteria	Gammaproteobacteria	Enterobacteriaceae	belongs_to_f_Enterobacteriaceae
OTU_324	1.49356	4.06766	0.898943	0.000115753	Proteobacteria	Gammaproteobacteria	Pseudomonadaceae	Pseudomonas
OTU_22355	2.96862	3.71997	0.663143	1.09285e-06	Proteobacteria	Gammaproteobacteria	Enterobacteriaceae	belongs_to_f_Enterobacteriaceae
OTU_22272	4.00068	3.69155	0.787278	5.97748e-05	Proteobacteria	Gammaproteobacteria	Enterobacteriaceae	belongs_to_f_Enterobacteriaceae
OTU_1101	2.29515	3.68056	0.65637	1.09285e-06	Proteobacteria	Gammaproteobacteria	Pseudomonadaceae	Pseudomonas
OTU_26671	0.867359	2.76345	0.872539	0.00921782	Proteobacteria	Betaproteobacteria	Oxalobacteraceae	belongs_to_f_Oxalobacteraceae
OTU_22372	1.95463	2.62367	0.747022	0.00332654	Proteobacteria	Gammaproteobacteria	Enterobacteriaceae	belongs_to_f_Enterobacteriaceae
OTU_22416	3.6986	2.50058	0.641253	0.00112601	Proteobacteria	Gammaproteobacteria	Enterobacteriaceae	Pantoea
OTU_543	22.3653	2.04254	0.564229	0.00247521	Proteobacteria	Betaproteobacteria	Oxalobacteraceae	Massilia
OTU_22301	0.742467	-1.79824	0.569064	0.00932973	Proteobacteria	Alphaproteobacteria	Caulobacteraceae	Caulobacter
OTU_339	4.85798	-1.95769	0.54701	0.00280131	Proteobacteria	Alphaproteobacteria	Xanthobacteraceae	Variibacter
OTU_522	2.42278	-1.99568	0.586918	0.00460655	Proteobacteria	Alphaproteobacteria	Rhizobiaceae	Rhizobium
OTU_16457	0.791446	-2.13569	0.62432	0.00439464	Actinobacteria	Actinobacteria	Streptomycetaceae	Streptomyces
OTU_1053	2.47882	-2.18309	0.609723	0.00280131	Proteobacteria	Alphaproteobacteria	Sphingomonadaceae	Sphingopyxis
OTU_2419	1.08472	-2.21102	0.5774	0.00127455	Proteobacteria	Alphaproteobacteria	Hyphomicrobiaceae	Devosia
OTU_330	3.06737	-2.21239	0.644742	0.0042924	Actinobacteria	Actinobacteria	Nakamurellaceae	Nakamurella
OTU_391	3.78643	-2.22702	0.575941	0.00120069	Proteobacteria	Alphaproteobacteria	belongs_to_o_Rhodospirillales	Reyranella
OTU_511	1.24544	-2.23132	0.672311	0.00585006	Actinobacteria	Acidimicrobiia	Acidimicrobiaceae	belongs_to_f_Acidimicrobiaceae
OTU_19030	4.01193	-2.27698	0.524831	0.000254502	Proteobacteria	Alphaproteobacteria	Rhizobiaceae	Rhizobium
OTU_407	2.59261	-2.28931	0.64182	0.00288375	Actinobacteria	Thermoleophilia	belongs_to_o_Gaiellales	belongs_to_o_Gaiellales
OTU_475	4.62419	-2.29922	0.627482	0.00212221	Proteobacteria	Alphaproteobacteria	Xanthobacteraceae	Variibacter
OTU_2921	1.40944	-2.36101	0.751916	0.0098692	Proteobacteria	Alphaproteobacteria	Sphingomonadaceae	belongs_to_f_Sphingomonadaceae
OTU_2031	1.42981	-2.36668	0.576519	0.000604894	Proteobacteria	Alphaproteobacteria	belongs_to_o_Rhizobiales	belongs_to_o_Rhizobiales
OTU_990	3.43593	-2.37389	0.564501	0.000416324	Proteobacteria	Alphaproteobacteria	belongs_to_o_Rhodospirillales	Reyranella
OTU_15943	0.817079	-2.37815	0.74383	0.008415	Proteobacteria	Alphaproteobacteria	belongs_to_o_Rhizobiales	belongs_to_o_Rhizobiales
OTU_1874	1.61829	-2.41785	0.622477	0.00117071	Proteobacteria	Alphaproteobacteria	Sphingomonadaceae	Sphingomonas
OTU_183	2.54406	-2.42996	0.695181	0.00348775	Actinobacteria	Actinobacteria	Microbacteriaceae	belongs_to_f_Microbacteriaceae
OTU_2676	1.08209	-2.43558	0.732554	0.00580633	Proteobacteria	Alphaproteobacteria	Caulobacteraceae	belongs_to_f_Caulobacteraceae
OTU_2552	0.986894	-2.45868	0.669903	0.00211075	Proteobacteria	Alphaproteobacteria	belongs_to_o_Sphingomonadales	belongs_to_o_Sphingomonadales
OTU_242	1.31147	-2.49058	0.763938	0.00692621	Actinobacteria	MB-A2-108	belongs_to_c_MB-A2-108	belongs_to_c_MB-A2-108
OTU_23683	1.35215	-2.50148	0.648231	0.00121222	Actinobacteria	Actinobacteria	Nocardioidaceae	Nocardioides
OTU_290	1.88229	-2.53428	0.555018	9.91581e-05	Actinobacteria	Actinobacteria	Nocardioidaceae	Nocardioides
OTU_987	1.00045	-2.56054	0.534118	4.41729e-05	Proteobacteria	Betaproteobacteria	Comamonadaceae	belongs_to_f_Comamonadaceae
OTU_1648	1.78882	-2.56287	0.666478	0.00125334	Proteobacteria	Alphaproteobacteria	Erythrobacteraceae	Altererythrobacter
OTU_24619	1.72246	-2.57364	0.63842	0.000805263	Proteobacteria	Alphaproteobacteria	belongs_to_o_Rhizobiales	Rhizomicrobium
OTU_392	9.96876	-2.57621	0.78325	0.00633394	Bacteroidetes	Sphingobacteriia	Sphingobacteriaceae	Sphingobacterium
OTU_1330	2.85408	-2.57641	0.597727	0.000269229	Proteobacteria	Alphaproteobacteria	Rhodospirillaceae	Dongia
OTU_684	1.26535	-2.58058	0.658058	0.00107681	Proteobacteria	Gammaproteobacteria	Xanthomonadaceae	Arenimonas
OTU_1793	1.13089	-2.71909	0.789811	0.00417971	Bacteroidetes	Sphingobacteriia	Chitinophagaceae	belongs_to_f_Chitinophagaceae
OTU_376	4.39309	-2.73736	0.713683	0.00127455	Bacteroidetes	Flavobacteriia	Flavobacteriaceae	Flavobacterium
OTU_1071	2.0548	-2.76821	0.703138	0.00104031	Proteobacteria	Alphaproteobacteria	belongs_to_o_Rhizobiales	belongs_to_o_Rhizobiales
OTU_1118	2.20418	-2.79929	0.874441	0.00840355	Proteobacteria	Alphaproteobacteria	belongs_to_o_Rhizobiales	belongs_to_o_Rhizobiales
OTU_525	2.69834	-2.80699	0.789296	0.00291394	Proteobacteria	Gammaproteobacteria	Xanthomonadaceae	Lysobacter
OTU_25971	5.60933	-2.81183	0.734977	0.00127455	Bacteroidetes	Sphingobacteriia	Sphingobacteriaceae	Pedobacter
OTU_8096	2.45861	-2.85165	0.576191	2.38039e-05	Actinobacteria	Actinobacteria	Streptomycetaceae	Streptomyces
OTU_5075	3.16996	-2.86531	0.768307	0.00173478	Proteobacteria	Alphaproteobacteria	Sphingomonadaceae	belongs_to_f_Sphingomonadaceae
OTU_19625	1.50799	-2.87183	0.715123	0.000834449	Proteobacteria	Gammaproteobacteria	Legionellaceae	Legionella
OTU_21291	1.32692	-2.87928	0.604509	4.56796e-05	Proteobacteria	Alphaproteobacteria	Rhizobiaceae	belongs_to_f_Rhizobiaceae
OTU_584	3.95007	-2.92874	0.527406	1.34426e-06	Proteobacteria	Alphaproteobacteria	Hyphomicrobiaceae	Hyphomicrobium
OTU_385	1.98563	-2.93632	0.825839	0.00291394	Actinobacteria	Thermoleophilia	belongs_to_o_Gaiellales	belongs_to_o_Gaiellales
OTU_266	2.49939	-2.96079	0.680281	0.000248196	Actinobacteria	Actinobacteria	Streptomycetaceae	Streptomyces
OTU_2738	1.7615	-2.97972	0.5488	2.0821e-06	Proteobacteria	Alphaproteobacteria	Erythrobacteraceae	Altererythrobacter
OTU_505	1.72785	-2.99028	0.880771	0.00462886	Actinobacteria	Actinobacteria	Promicromonosporaceae	Promicromonospora
OTU_22366	2.13894	-2.99395	0.626893	4.51136e-05	Actinobacteria	Actinobacteria	Pseudonocardiaceae	belongs_to_f_Pseudonocardiaceae
OTU_1243	2.88346	-3.00393	0.716545	0.000426788	Proteobacteria	Alphaproteobacteria	Erythrobacteraceae	Altererythrobacter
OTU_2181	2.21687	-3.11275	0.722117	0.000269229	Proteobacteria	Alphaproteobacteria	Methylobacteriaceae	Microvirga
OTU_1096	2.36047	-3.14203	0.668032	5.83573e-05	Proteobacteria	Betaproteobacteria	Comamonadaceae	belongs_to_f_Comamonadaceae
OTU_432	1.89538	-3.14464	0.811242	0.00118128	Bacteroidetes	Sphingobacteriia	Chitinophagaceae	Niastella
OTU_23707	2.37237	-3.17813	0.486628	1.04362e-08	Proteobacteria	Betaproteobacteria	Comamonadaceae	belongs_to_f_Comamonadaceae
OTU_1128	2.74729	-3.20207	0.587536	2.01063e-06	Proteobacteria	Gammaproteobacteria	Legionellaceae	Legionella
OTU_3483	2.7059	-3.20317	0.807325	0.000939755	Actinobacteria	Actinobacteria	Nocardioidaceae	Nocardioides
OTU_22585	3.41271	-3.29065	0.883487	0.00173515	Actinobacteria	Actinobacteria	belongs_to_c_Actinobacteria	belongs_to_c_Actinobacteria
OTU_19206	2.13423	-3.30655	0.844307	0.00107681	Proteobacteria	Alphaproteobacteria	Rhizobiaceae	Rhizobium
OTU_27447	1.72209	-3.33682	0.833396	0.000852758	Bacteroidetes	Flavobacteriia	Flavobacteriaceae	belongs_to_f_Flavobacteriaceae
OTU_22455	2.12442	-3.37874	0.896885	0.00152075	Actinobacteria	Actinobacteria	Microbacteriaceae	Amnibacterium
OTU_593	3.2854	-3.48768	0.54102	1.3707e-08	Actinobacteria	Actinobacteria	Nocardioidaceae	Nocardioides
OTU_748	2.84318	-3.55758	0.563914	2.24618e-08	Actinobacteria	Actinobacteria	Streptomycetaceae	Streptomyces
OTU_1517	2.0049	-3.61677	0.662605	2.01063e-06	Actinobacteria	Actinobacteria	Micromonosporaceae	belongs_to_f_Micromonosporaceae
OTU_1261	4.07937	-3.73973	1.13385	0.00621343	Actinobacteria	Actinobacteria	Streptomycetaceae	Streptomyces
OTU_789	4.1672	-3.82129	0.601466	2.01911e-08	Proteobacteria	belongs_to_p_Proteobacteria	belongs_to_p_Proteobacteria	belongs_to_p_Proteobacteria
OTU_1390	5.45891	-4.43319	0.744019	1.74261e-07	Proteobacteria	Alphaproteobacteria	Rhizobiaceae	Rhizobium
OTU_28020	5.78211	-4.74909	1.02309	7.1896e-05	Saccharibacteria	belongs_to_p_Saccharibacteria	belongs_to_p_Saccharibacteria	belongs_to_p_Saccharibacteria
